# Supplementary material
Source: PubMed Central journal article supplement (PMC10358015)
Supplement: 12672_2013_158_MOESM6_ESM.pdf [file 12672_2013_158_MOESM6_ESM.pdf]

### Online Resource 1. Expression of biomarkers in ER/PR positive human breast carcinomas

| Case number | Age         | Tumor size | Grade | PRA+ %      | PRB+ %      | PRA+PRB+ %  | E-cadherin expression |                    |
|-------------|-------------|------------|-------|-------------|-------------|-------------|-----------------------|--------------------|
|             |             |            |       |             |             |             | In Situ Carcinoma     | Invasive Carcinoma |
| 1           | 35          | 1 cm       | NA    | 50.0        | 21.5        | 20.0        | Normal *              | Absent ***         |
| 2           | 37          | 1.6 cm     | II    | 60.9        | 47.9        | 46.6        | Normal                | Normal             |
| 3           | 41          | 2.2 cm     | II    | 27.1        | 38.5        | 26.8        | Decreased**           | Decreased          |
| 4           | 42          | 0.9 cm     | II    | 53.4        | 41.1        | 36.4        | Normal                | Decreased          |
| 5           | 43          | 1.6 cm     | II    | 71.1        | 64.4        | 62.4        | Decreased             | Decreased          |
| 6           | 46          | 1 cm       | I     | 67.9        | 66.5        | 62.6        | Decreased             | Decreased          |
| 7           | 46          | 2.7 cm     | II    | 69.2        | 67.4        | 65.7        | Normal                | Normal             |
| 8           | 48          | 2.5 cm     | III   | 57.5        | 51.5        | 50.8        | Decreased             | Absent             |
| 9           | 48          | 1.2 cm     | I     | 70.2        | 59.0        | 50.6        | Normal                | Normal             |
| 10          | 48          | 1.5 cm     | II    | 63.6        | 53.8        | 50.0        | Decreased             | Absent             |
| 11          | 52          | 1 cm       | I     | 61.7        | 45.1        | 39.9        | Normal                | Absent             |
| 12          | 53          | 1.8 cm     | II    | 42.4        | 44.1        | 39.6        | Decreased             | Absent             |
| 13          | 65          | 0.5 cm     | I     | 68.6        | 68.1        | 61.0        | Normal                | Normal             |
| 14          | 67          | 3 cm       | III   | 34.1        | 28.8        | 26.8        | Decreased             | Decreased          |
| 15          | 67          | 1.6 cm     | NA    | 72.8        | 51.5        | 46.9        | Decreased             | Absent             |
| 16          | 68          | 0.7 cm     | II    | 48.5        | 48.9        | 47.2        | Normal                | Absent             |
| 17          | 83          | 0.6 cm     | I     | 64.4        | 63.5        | 58.9        | Normal                | Absent             |
| 18          | 83          | 1.9 cm     | NA    | 32.9        | 36.0        | 29.3        | Normal                | Normal             |
| 19          | 84          | 1 cm       | II    | 67.9        | 70.3        | 64.2        | Decreased             | Decreased          |
| 20          | 84          | 4 cm       | II    | 67.0        | 67.9        | 58.0        | Normal                | Normal             |
| 21          | 96          | 3 cm       | III   | 43.6        | 36.8        | 34.9        | Decreased             | Decreased          |
| <b>Mean</b> | <b>58.9</b> |            |       | <b>56.9</b> | <b>51.1</b> | <b>46.6</b> |                       |                    |
| <b>SD</b>   | <b>18.3</b> |            |       | <b>14.0</b> | <b>14.2</b> | <b>13.9</b> |                       |                    |

Numbers in the table indicate the percent of PRA-positive (PRA+), PRB-positive (PRB+), and double positive PRA+PRB+ tumor cells in invasive carcinoma with at least 1000 tumor cell counted per sample.

NA - tumor grade was not presented in the pathology report

\* Normal - E-cadherin expression in carcinoma is similar to E-cadherin expression in normal mammary tissue adjacent to the tumor

\*\* Decreased - E-cadherin expression in carcinoma is decreased when compared with the normal mammary tissue adjacent to the tumor

\*\*\* Absent - E-cadherin expression is lost in the majority of cells in invasive carcinoma
