# Supplementary material
Source: PubMed Central journal article supplement (PMC10358015)

Online Resource 2.

YB cells: **E-cadherin** / **DAPI**

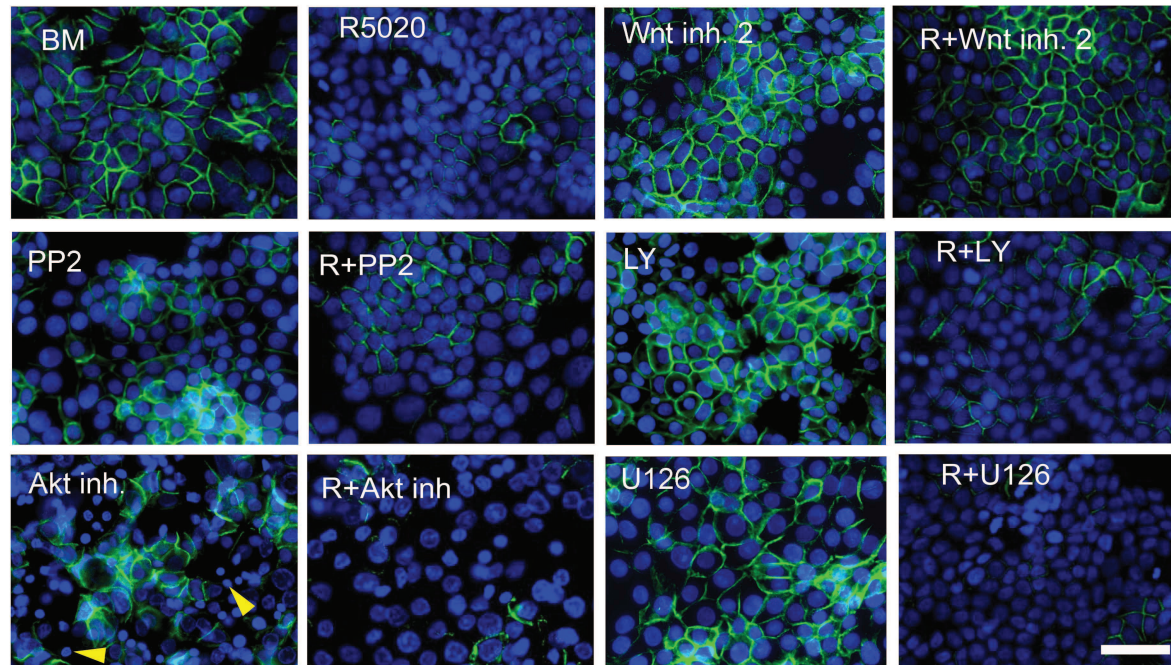

Supplement: 12672_2013_158_MOESM2_ESM.pdf [file 12672_2013_158_MOESM2_ESM.pdf]

Online Resource 3.

YB cells **PRB/DAPI**

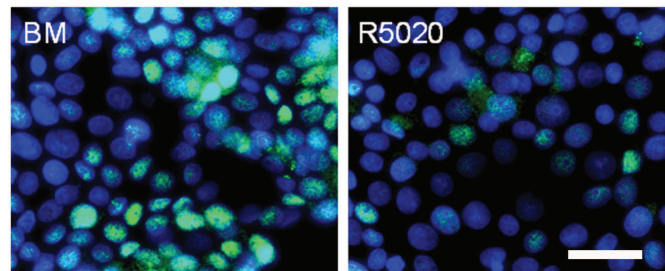

Supplement: 12672_2013_158_MOESM3_ESM.pdf [file 12672_2013_158_MOESM3_ESM.pdf]

## Online Resource 4.

a. Serum estradiol levels

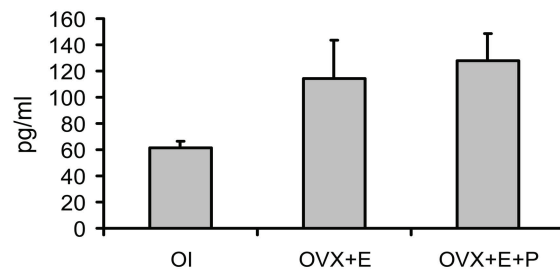

b. Serum progesterone levels

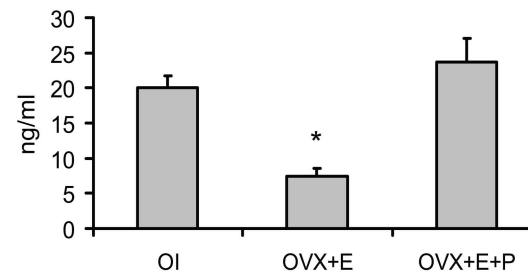

Supplement: 12672_2013_158_MOESM4_ESM.pdf [file 12672_2013_158_MOESM4_ESM.pdf]

Online Resource 5.

a) YB cells **Phospho-Erk/DAPI**

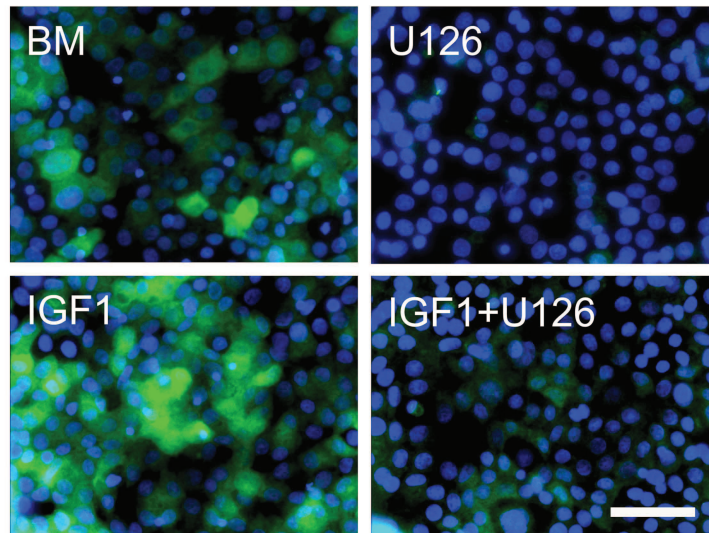

b) YB cells **Phospho-Akt/DAPI**

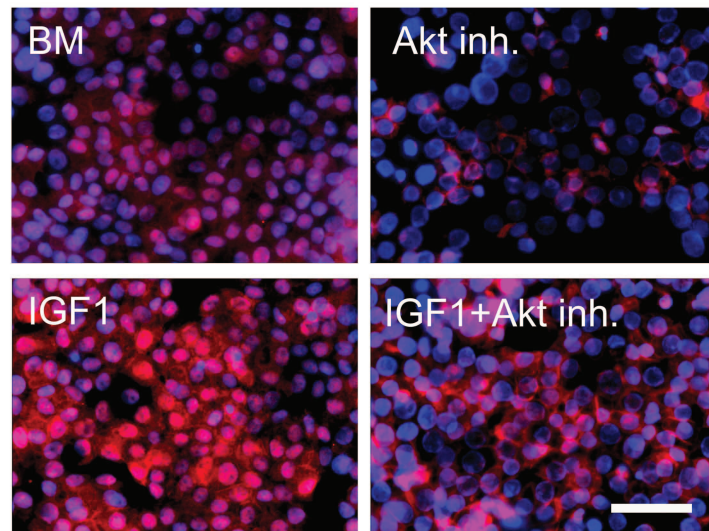

Supplement: 12672_2013_158_MOESM5_ESM.pdf [file 12672_2013_158_MOESM5_ESM.pdf]
